# Supplementary material for: Study on the Interaction of Polymeric Chemical Additives with Phase Change Materials in Air Lime Renders
Source: MDPI journal article supplement (doi:10.3390/polym16081121), 2024-04-17
Supplement: s1 [file s1]

# SUPPLEMENTARY MATERIAL

Study on the interaction of polymeric chemical additives with phase change materials in air lime renders

A. Rubio-Aguinaga<sup>a</sup>, J.M. Fernández<sup>a</sup>, I. Navarro-Blasco<sup>a</sup>, J.I. Álvarez<sup>a\*</sup>

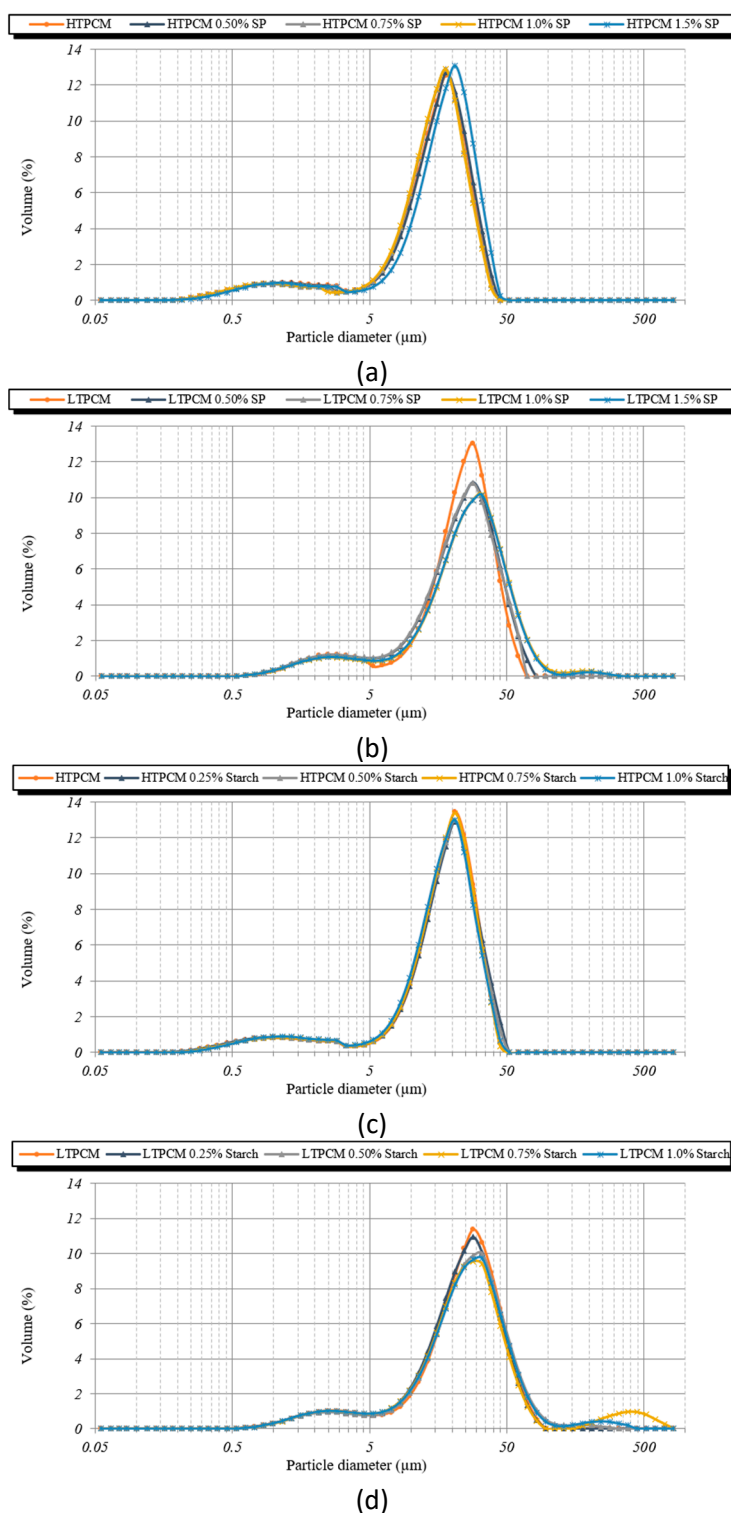

**Figure S1:** Particle size distribution of 5% wt/wt PCM with either increasing superplasticizer dosages in: (a) 5% wt/wt HTPCM, (b) 5% wt/wt LTPCM; or increasing starch dosages in (c) 5% wt/wt HTPCM and (d) 5% wt/wt LTPCM suspensions.

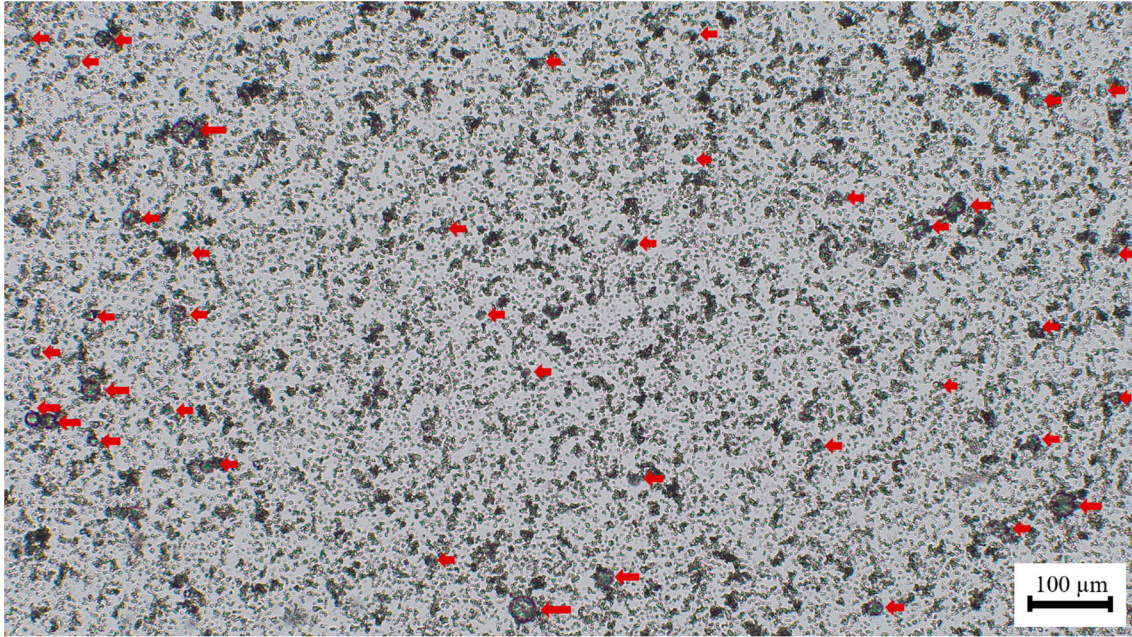

**Figure S2:** Optical micrograph of HTPCM-lime suspension with 1% bwol of superplasticizer. Most of the microcapsules of PCMs are denoted with red arrows to identify their dispersion. Image captured at 10x.

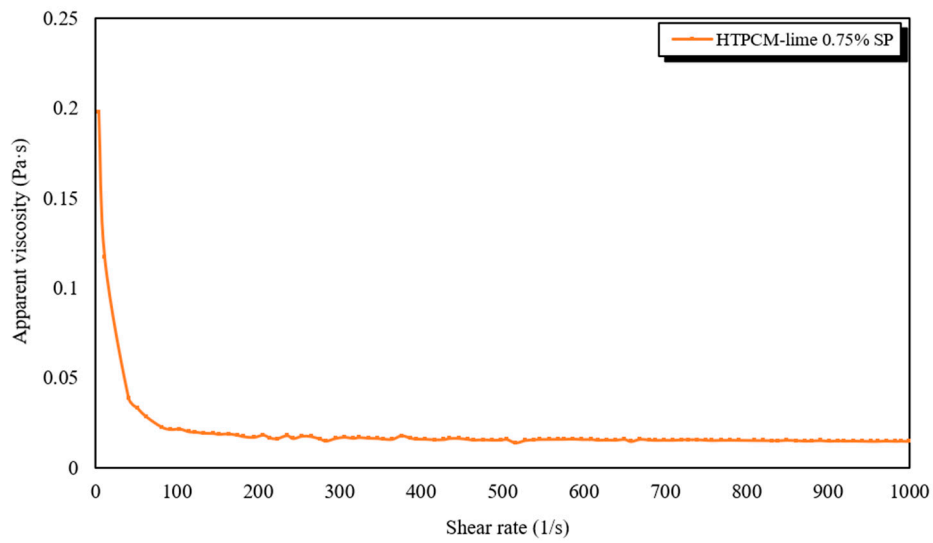

**Figure S3:** Viscosity measurements of 50% wt/wt lime, 5% bwol of HTPCM and 0.75% bwol of SP.

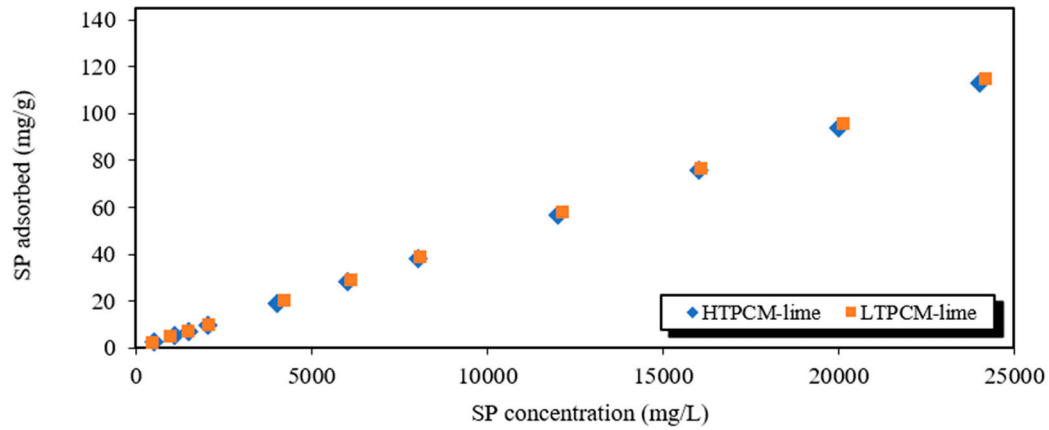

(a)

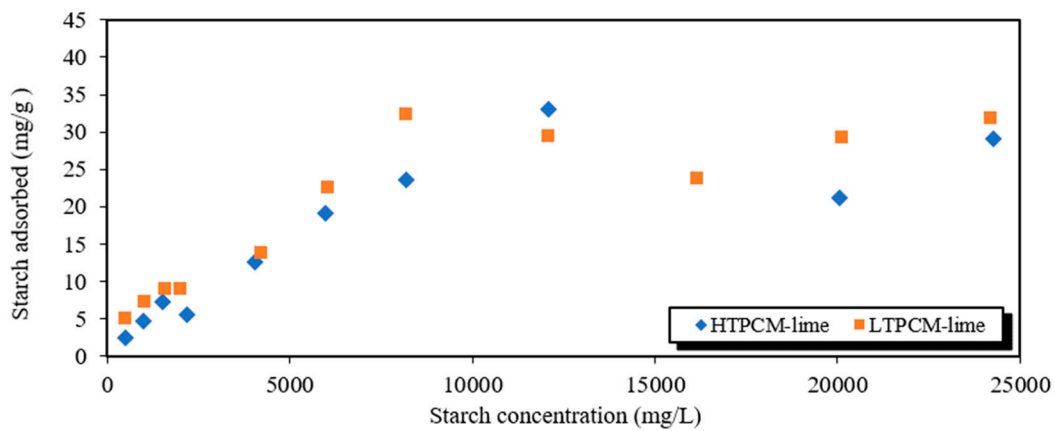

(b)

**Figure S4:** Adsorption isotherm curves onto PCM-lime of: (a) superplasticizer and (b) starch.

**Table S1:** Results of adsorption isotherms onto PCM-lime suspensions of superplasticizer: Langmuir and Freundlich adsorption parameters.

|       | Superplasticizer |                      |                |            |        |                |
|-------|------------------|----------------------|----------------|------------|--------|----------------|
|       | Langmuir         |                      |                | Freundlich |        |                |
|       | qm (mg/g)        | b (L/mg)             | R <sup>2</sup> | K          | 1/n    | R <sup>2</sup> |
| HTPCM | 10762.5          | $4.41 \cdot 10^{-7}$ | 0.7024         | 0.00485    | 0.9970 | 0.9999         |
| LTPCM | -                | -                    | -              | 0.00464    | 1.0021 | 0.9999         |

Notes: qm: maximum sorption capacity. b: the Langmuir constant. K, 1/n: the Freundlich constants. R<sup>2</sup>: correlation coefficient of the linear regression.

**Table S2:** Results of adsorption isotherms onto PCM-lime suspensions of adhesion booster: Langmuir and Freundlich adsorption parameters.

|       | Adhesion booster |                      |                |            |        |                |
|-------|------------------|----------------------|----------------|------------|--------|----------------|
|       | Langmuir         |                      |                | Freundlich |        |                |
|       | qm (mg/g)        | b (L/mg)             | R <sup>2</sup> | K          | 1/n    | R <sup>2</sup> |
| HTPCM | 40.2             | $1.33 \cdot 10^{-4}$ | 0.6727         | 0.03598    | 0.7003 | 0.8811         |
| LTPCM | 36.1             | $2.27 \cdot 10^{-4}$ | 0.8734         | 0.22099    | 0.5058 | 0.9213         |

Notes: qm: maximum sorption capacity. b: the Langmuir constant. K, 1/n: the Freundlich constants. R<sup>2</sup>: correlation coefficient of the linear regression.
